# Supplementary material
Source: publisher figshare collection journal article supplement (https://acs.figshare.com/ndownloader/files/4685704)
Supplement: Supplementary file 1 [file 4685704]

SUPPORTING INFORMATION to

# Reactive Alkyne and Azide Solid Supports to Increase Yields and Purity of Polymeric Stars and Dendrimers via the ‘Click’ Reaction.

*Carl N. Urbani, Craig A. Bell, Daria E. Lonsdale, Michael R. Whittaker and Michael J. Monteiro\**

1. Australian Institute of Bioengineering and Nanotechnology, School of Molecular and Microbial Sciences, University of Queensland, Brisbane QLD 4072, Australia

## **EXPERIMENTAL**

### **Materials**

The following monomers were deinhibited before use by passing through a basic alumina column; 4-vinylbenzyl chloride (VBC: Aldrich, 97 %), divinylbenzene (DVB: Aldrich, 80 %, mixture of isomers, tech grade) and styrene (STY: Aldrich, >99 %).

The following chemicals were used as received: alumina, activated basic alumina (Aldrich: Brockmann I, standard grade, ~ 150 mesh, 58 Å), anhydrous magnesium sulfate (MgSO<sub>4</sub>: Scharlau, extra pure), sodium chloride (NaCl: Univar, 99.9 %), sodium hydroxide (NaOH: Univar, AR grade), triethylamine (TEA: Fluka, 98 %), 2-bromoisobutyryl bromide (BIB: Aldrich, 98 %), DL-1,2-isopropylideneglycerol

(Solketal: Aldrich, 98 %), acetone (ChemSupply, AR), diethyl ether (Univar, AR grade), hydrochloric acid (HCl, Univar, 32 %), methanol, anhydrous (MeOH: Mallinckrodt, 99.9 %, HPLC grade), Milli-Q water (Biolab, 18.2 MΩm), N,N-dimethylformamide (DMF: Labscan, AR grade), tetrahydrofuran (THF: Labscan, HPLC grade), bromoacetyl bromide (BAB: Fluka, 98 %), propargyl alcohol (Aldrich, 99 %), sodium azide (NaN<sub>3</sub>: Aldrich, ≥ 99.5 %), tripropargylamine (TPA: Aldrich, 98 %).

The following initiators, ligands and metals for the various polymerizations are given below and used as received unless otherwise stated. N,N,N',N',N''-pentamethyldiethylenetriamine (PMDETA: Aldrich, 99 %), copper (I) bromide (CuBr: Aldrich, 99.999 %), copper (II) bromide (CuBr<sub>2</sub>: Aldrich, 99 %), ethyl-2-bromoisobutyrate (EBiB: Aldrich, 98 %), and dimethyl 2,6-dibromoheptanedioate (DMDBHD: Aldrich, 97 %). 2,2-azobis(isobutyronitrile) (AIBN: Riedel-de Haën, 98 %) was recrystallized from methanol before use.

### Synthesis of Functional ATRP Initiator

*Synthesis of (2,2-dimethyl-1,3-dioxolan-4-yl)methyl 2-bromo-2-methylpropanoate:*

This compound was prepared according to the literature procedure.<sup>1</sup>

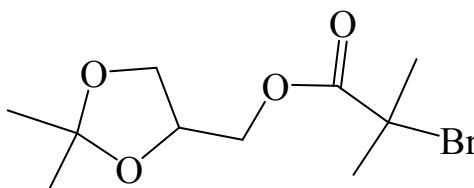

DL-1,2-Isopropylideneglycerol (10.63 g, 0.080 mol), TEA (9.77 g, 0.097 mol) and THF (50 mL) were added to a round bottom flask and stirred at 0 °C under N<sub>2</sub>. A solution of 2-bromoisobutyryl bromide (23.064 g, 0.10 mol) in THF (100 mL) was

added drop wise to the stirred solution over a 1 h period. The reaction mixture was then stirred at room temperature for a further 3 h. The solvent was removed by rotary evaporation and the residue taken up into diethyl ether (50 mL) and filtered. The organic layer was washed with a 10 % HCl solution, brine and Milli-Q water. The organic layer was dried over  $\text{MgSO}_4$  and the solvent removed by rotary evaporation and dried *in vacuo*. The product was used without further purification.  $^1\text{H}$  NMR ( $\text{CDCl}_3$ )  $\delta$  = 0.196 ( $\text{Si}(\text{CH}_3)_3$ ), 1.350 (3H s,  $\text{CHCH}_2\text{OCCH}_2$ ), 1.425 (3H s,  $\text{CH}_2\text{CHOCCCH}_2$ ), 1.930 (6H s,  $\text{OC}(=\text{O})\text{C}(\text{CH}_3)_2$ ), 3.8 – 4.3 (5H m)

### Synthesis of polymers using ATRP

*Synthesis of PSTY-Br:* Styrene (15.06 g, 0.145 mol), PMDETA (0.190 mL,  $9.09 \times 10^{-4}$  mol), EBiB (0.145 g,  $7.44 \times 10^{-4}$  mol) and  $\text{CuBr}_2$  (0.0346 g,  $1.55 \times 10^{-4}$  mol) were added to a 50 mL Schlenk flask then purged with  $\text{N}_2$  for 20 min. After 1 h stirring,  $\text{CuBr}$  (0.109 g,  $7.60 \times 10^{-4}$  mol) was added under positive  $\text{N}_2$  flow, the flask sealed and purged with  $\text{N}_2$  for a further 5 min. The polymerisation was carried out at 80 °C in a temperature controlled oil bath for 205 min. The polymerisation was terminated by quenching in liquid nitrogen and then exposure to air. The polymerization mixture was diluted with THF then the copper salts were removed by passage through an activated basic alumina column. The solution was concentrated by airflow and the polymer recovered by precipitation into methanol, filtration and drying for 48 h under high vacuum at 25 °C. The polymer was characterized by SEC ( $M_n$  = 5125, PDI = 1.09).

*Synthesis of Br-PSTY-Br:* Styrene (16.236 g, 0.156 mol), PMDETA (0.332 mL,  $1.59 \times 10^{-3}$  mol) and DMDBHD (0.279 g,  $8.1 \times 10^{-4}$  mol) were added to a 50 mL Schlenk flask equipped with a magnetic stirrer. The solution was degassed by 4 freeze-pump-

thaw cycles under high vacuum. The Schlenk flask was then flushed with high purity argon and CuBr (0.114 g,  $7.9 \times 10^{-4}$  mol) was carefully added under positive argon flow. The polymerisation was carried out in a temperature controlled oil bath at 100 °C for 20 min. The polymerisation was terminated by quenching in liquid nitrogen and exposure to air. The polymerization mixture was diluted with THF, and the copper salts were removed by passage through an activated basic alumina column. The solution was concentrated by airflow, and the polymer recovered by precipitation into methanol. The recovered polymer was dried for 48 h under high vacuum at 25 °C. The polymer was characterized by SEC ( $M_n = 3560$ , PDI = 1.11).

*Synthesis of Sol-PSTY-Br:* Styrene (30.0 g, 0.288 mol), PMDETA (0.262 g,  $1.5 \times 10^{-3}$  mol), (2,2-dimethyl-1,3-dioxolan-4-yl)methyl 2-bromo-2-methylpropanoate (0.427 g,  $1.5 \times 10^{-3}$  mol) and pre-formed CuBr<sub>2</sub>/PMDETA complex (0.061 g,  $1.5 \times 10^{-4}$  mol) were added to a 50 mL Schlenk flask equipped with a magnetic stirrer, and purged with N<sub>2</sub> for 20 min. CuBr (0.216 g,  $1.5 \times 10^{-3}$  mol) was then added under a positive N<sub>2</sub> flow, and the flask sealed and purged with N<sub>2</sub> for a further 5 min. The flask was placed in an oil bath at 80 °C for 2 h after which the polymerization was terminated by quenching in liquid N<sub>2</sub> and exposure to air. The polymerization mixture was diluted with THF, and the copper salts were removed by passage through an activated basic alumina column. The solution was concentrated by airflow, and the polymer recovered by precipitation into methanol. The recovered polymer was dried for 48 h under high vacuum at 25 °C. The polymer was analysed by SEC ( $M_n = 4661$ , PDI = 1.09).

### **Synthesis of polymers with azide functionality**

*Synthesis of PSTY-N<sub>3</sub>:* A typical azidation procedure was as follows: PSTY-Br (2.0 g, 0.39 mmol) was dissolved in 20 mL of DMF in a 50 mL reaction vessel. NaN<sub>3</sub> (0.278

g, 4.3 mmol) was added and the mixture stirred for 24 h at 50 °C. The polymer was precipitated into MeOH, recovered by vacuum filtration and washed exhaustively with water and MeOH. The polymer was dried under vacuum for 48 h at 25 °C.

Similarly, N<sub>3</sub>-PSTY-N<sub>3</sub> and Sol-PSTY-N<sub>3</sub> were prepared from Br-PSTY-Br and Sol-PSTY-Br respectively.

### **Synthesis of functionalized crosslinked solid supports**

*Synthesis of 4-vinylbenzyl chloride crosslinked Solid supports (1):* 4-vinylbenzyl chloride (4 mL, 0.028 mol), styrene (3.2 mL, 0.028 mol), divinylbenzene (0.120 mL,  $8.42 \times 10^{-4}$  mol) and AIBN (6.9 mg,  $4.19 \times 10^{-5}$  mol) were added to a 20 mL glass vial equipped with a magnetic stirrer and sealed with rubber septa. The mixture was purged with N<sub>2</sub> for 10 min then heated in a temperature controlled oil bath set at 50 °C for 24 h. The crosslinked polymer was ground to a fine powder with mortar and pestle then stirred in 50 mL of DMF at 50 °C for 1 h. The mixture was filtered hot, and the washing procedure repeated twice. The polymer was then filtered and washed with DMF and then acetone. The functional crosslinked polymer was then dried under high vacuum for 16 h.

*Synthesis of alkyne functionalized crosslinked Solid supports (2):* Propargyl alcohol (4.9 mL, 0.087 mol), NaOH (0.07 g, 0.017 mol) and DMF (40 mL) were added to a 50 mL round bottom flask. The mixture was heated under nitrogen in a temperature controlled oil bath at 40 °C. After 20 min, **1** (4 g) was added and the mixture was stirred for a further 24 h. The reaction mixture was filtered hot and washed with water and then acetone. The functionalised crosslinked polymer was then stirred in 50 ml of DMF at 90 °C for 30 min after which the mixture was filtered hot and this washing

procedure repeated twice. Finally, the polymer was filtered and washed with DMF and then acetone. The polymer was then dried under high vacuum.

*Synthesis of azide functionalized crosslinked Solid supports (3):* **1** (4 g), NaN<sub>3</sub> (5.68 g, 0.087 mol) and DMF (40 mL) were added to a 50 mL round bottom flask equipped with a magnetic stirrer. The mixture was heated in a temperature controlled oil bath at 50 °C for 48 h. The mixture was filtered hot and washed with water and acetone. The functionalised crosslinked polymer was then stirred in 50 ml of DMF at 90 °C for 30 min after which the mixture was filtered hot and this washing procedure repeated twice. Finally, the polymer was filtered and washed with DMF and then acetone. The polymer was then dried under high vacuum.

### **Evaluation of effectiveness of functionalized crosslinked solid supports**

Testing of alkyne functionalized crosslinked solid supports: PSTY-N<sub>3</sub> (10.0 mg,  $1.95 \times 10^{-6}$  mol), PSTY Standard (Internal Standard 110000 g/mol, 10.1 mg) and DMF (1 mL) were added to a 10 mL Schlenk flask. An aliquot from the mixture was removed for SEC analyses. Alkyne functionalised crosslinked solid supports, **2**, and PMDETA (4.1 µL,  $1.96 \times 10^{-5}$  mol) were then added to the mixture and purged with nitrogen for 10 min. CuBr (2.7 mg,  $1.88 \times 10^{-5}$  mol) was carefully added under a positive flow of N<sub>2</sub> and the solution purged with N<sub>2</sub> for a further 5 min. The flask was placed in a temperature controlled oil bath at 80 °C for 4 h. Samples were taken during the reaction for SEC analyses.

Similarly, the azide functionalized crosslinked solid supports, **3**, were tested using (≡)<sub>2</sub>-PSTY-(≡)<sub>2</sub>.

### 3-arm PSTY Star

*Synthesis of 3-arm core PSTY-( $\equiv$ )<sub>2</sub>*: PSTY-N<sub>3</sub> (0.179 g,  $3.49 \times 10^{-5}$  mol), PMDETA (0.075 mL,  $3.59 \times 10^{-4}$  mol), TPA (0.100 mL,  $7.07 \times 10^{-4}$  mol) and DMF (1.8 mL) were added to a 10 mL Schlenk flask and the solution purged with N<sub>2</sub> for 10 min. CuBr (0.0521 g,  $3.63 \times 10^{-4}$  mol) was carefully added under a positive flow of N<sub>2</sub> and the solution purged with N<sub>2</sub> for a further 5 min. The flask was placed in a temperature controlled oil bath at 80 °C for 2 h. The reaction was diluted with 5 mL THF, and passed through activated basic alumina to remove the copper salts. The polymer was precipitated in MeOH, then filtered and dried for 24 h under vacuum.

*Synthesis of 3-arm PSTY Star*: PSTY-( $\equiv$ )<sub>2</sub> (0.110 g,  $2.15 \times 10^{-5}$  mol), Sol-PSTY-N<sub>3</sub> (0.226 g,  $4.76 \times 10^{-5}$  mol), PMDETA (0.014 mL,  $6.70 \times 10^{-5}$  mol) and DMF (3.5 mL) were added to a 10 mL Schlenk flask, and the solution purged with N<sub>2</sub> for 10 min. CuBr (0.0104 g,  $7.3 \times 10^{-5}$  mol) was carefully added under a positive flow of N<sub>2</sub>, the flask sealed and purged with N<sub>2</sub> for a further 5 min. The flask was placed in a temperature controlled oil bath at 80 °C for 2 h. The reaction was diluted with 5 mL of THF then passed through activated basic alumina to remove the copper salts.

THF was removed by evaporation and the polymer in residual DMF was added to a 10 mL Schlenk flask equipped with magnetic stirrer. PMDETA (0.023 mL,  $1.1 \times 10^{-4}$  mol) and **2** (0.1 g) were added, and the mixture purged with N<sub>2</sub> for 10 min. CuBr (1.6 mg,  $1.11 \times 10^{-5}$  mol) was carefully added under a positive flow of N<sub>2</sub>, the flask was sealed and purged with N<sub>2</sub> for a further 5 min. The flask was placed in a temperature controlled oil bath at 80 °C for 4 h. The reaction was filtered hot through a fine glass frit and the solid supports washed with THF (10 mL). The filtrate was passed through

activated basic alumina to remove the copper salts, and the polymer was precipitated in MeOH, filtered and dried for 24 h under vacuum.

## **2<sup>nd</sup> Generation PSTY Dendrimer**

*Synthesis of 1<sup>st</sup> Generation PSTY Dendrimer* ( $\equiv$ )<sub>2</sub>-PSTY-( $\equiv$ )<sub>2</sub>: N<sub>3</sub>-PSTY-N<sub>3</sub> (0.5 g,  $1.40 \times 10^{-4}$  mol), PMDETA (0.587 mL,  $2.81 \times 10^{-3}$  mol), TPA (0.791 mL,  $5.60 \times 10^{-3}$  mol) and DMF (5 mL) were added to a 10 mL Schlenk flask equipped with magnetic stirrer. The solution was purged with N<sub>2</sub> for 10 min and then CuBr (0.403 g,  $2.81 \times 10^{-3}$  mol) was carefully added under a positive flow of N<sub>2</sub>. The reaction mixture was purged with N<sub>2</sub> for a further 5 min. The flask was placed in a temperature controlled oil bath at 80 °C for 2 h. The reaction was diluted with 5 mL THF, and passed through activated basic alumina to remove the copper salts. The polymer was precipitated in MeOH, filtered and dried for 24 h under vacuum.

*Synthesis of 2<sup>nd</sup> Generation PSTY Dendrimer*: ( $\equiv$ -)<sub>2</sub>-PSTY-( $\equiv$ )<sub>2</sub> (0.1 g,  $2.5 \times 10^{-5}$  mol), Sol-PSTY-N<sub>3</sub> (0.512 g,  $1.1 \times 10^{-4}$  mol), PMDETA (0.209 mL,  $1.0 \times 10^{-3}$  mol) and 5 mL of DMF were added to a 10 mL Schlenk flask. The solution was purged with N<sub>2</sub> for 10 min after which CuBr (0.148 mg,  $1.03 \times 10^{-3}$  mol) was carefully added under a positive flow of N<sub>2</sub>. The reaction mixture was purged with N<sub>2</sub> for a further 5 min. The flask was placed in a temperature controlled oil bath at 80 °C for 2 h. The reaction was diluted with 5 mL of THF, and passed through activated basic alumina to remove the copper salts to give dendrimer.

THF was removed by evaporation and the polymer in residual DMF was added to a 10 mL Schlenk flask, equipped with magnetic stirrer. PMDETA (0.057 mL,  $0.27 \times 10^{-4}$  mol) and **2** (0.18 g) were added to the flask and the mixture purged with N<sub>2</sub> for 10 min. CuBr (0.036 g,  $2.5 \times 10^{-4}$  mol) was then carefully added under a positive flow of N<sub>2</sub> and



the solution purged with N<sub>2</sub> for a further 5 min. The flask was placed in a temperature controlled oil bath set at 80 °C for 4 h. The reaction was filtered hot through a fine glass frit and the solid supports washed with 10 mL of THF. The filtrate was passed through activated basic alumina to remove the copper salts and the polymer was precipitated in MeOH, then filtered and dried for 24 h under vacuum.

### **Analytical Methodologies**

*Attenuated Total Reflectance Fourier Transform Spectroscopy (ATR-FTIR):* ATR-FTIR spectra were recorded between 4000 and 550 cm<sup>-1</sup> in a Perkin Elmer FT-2000 FTIR spectrometer equipped with a single reflection diamond window. Each spectrum had a 32 scan accumulation using a spectral resolution of 8 cm<sup>-1</sup>.

*Size Exclusion Chromatography (SEC):* The molecular weight distributions of nanoparticles were measured by SEC. All polymer samples were dried prior to analysis in a vacuum oven for two days at 40 °C. The dried polymer was dissolved in tetrahydrofuran (THF) (Labscan, 99%) to a concentration of 1 mg/mL. This solution was then filtered through a 0.45 µm PTFE syringe filter. Analysis of the molecular weight distributions of the polymer nanoparticles was accomplished by using a Waters 2695 Separations Module, fitted with two Ultrastyrigel linear columns (7.8 x 300 mm) kept in series. These columns were held at a constant temperature of 35°C for all analyses. The columns used separate polymers in the molecular weight range of 500 – 2 million g/mol with high resolution. THF was the eluent used at a flow rate of 1.0 mL/min. Calibration was carried out using narrow molecular weight PSTY standards (PDI ≤ 1.1) ranging from 500 – 2 million g/mol. Data acquisition was performed using

Waters Millenium software (ver. 3.05.01) and molecular weights were calculated by using a 5<sup>th</sup> order polynomial calibration curve.

## REFERENCE

1. Perrier, S.; Armes, S. P.; Wang, X. S.; Malet, F.; Haddleton, D. M. *Journal of Polymer Science, Part A: Polymer Chemistry* **2001**, 39, (10), 1696-1707.
